# Supplementary material for: More than royal food - Major royal jelly protein genes in sexuals and workers of the honeybee Apis mellifera
Source: PubMed Central journal article supplement (PMC4176732; doi:10.1186/1742-9994-10-72), 2013-11-27
Supplement: 1742-9994-10-72-S1.pdf [file 1742-9994-10-72-S1.pdf]

## Additional File 1

Buttstedt A, Moritz RFA & Eler S (2013): More than royal food - *Major royal jelly protein genes in sexuals and workers of the honeybee *Apis mellifera** – *Frontiers in Zoology*

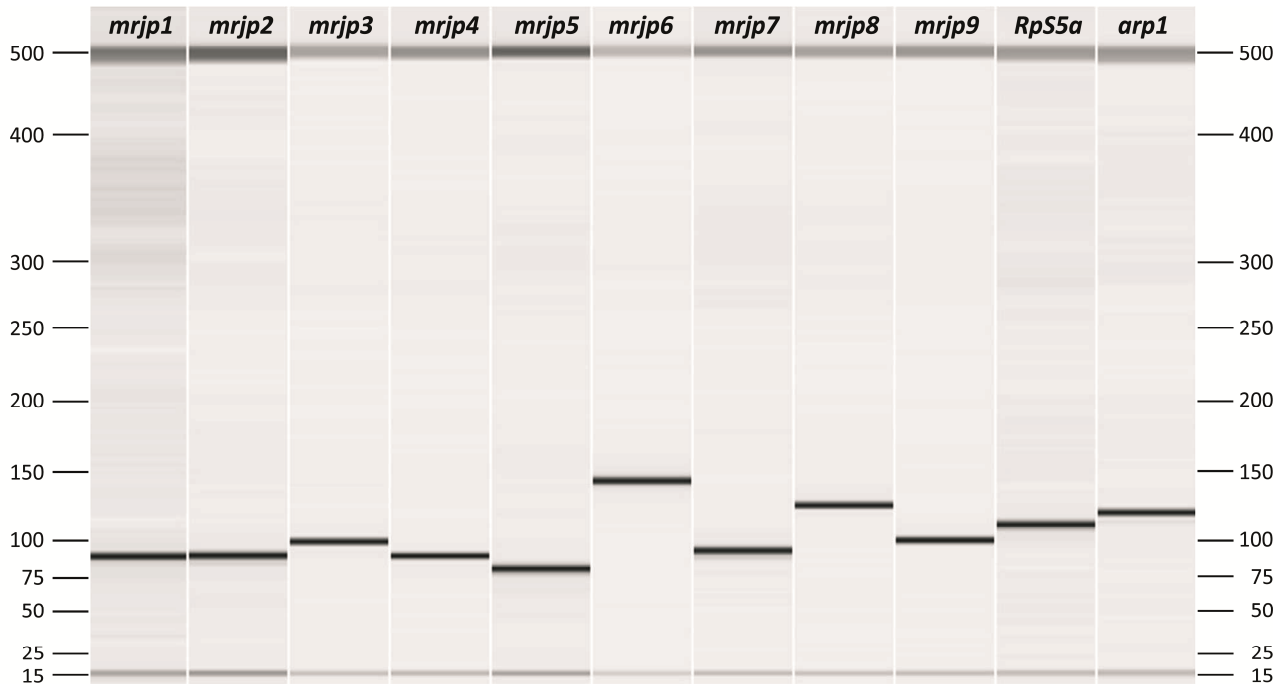

**Figure S1:** Analysis of qPCR product specificity; *mrjp1* – 89 bp, *mrjp2* – 90 bp, *mrjp3* – 102 bp, *mrjp4* – 91 bp, *mrjp5* – 80 bp, *mrjp6* – 146 bp, *mrjp7* – 95 bp, *mrjp8* – 130 bp, *mrjp9* – 103 bp, *RpSa5* – 115 bp, *arp1* – 120 bp.

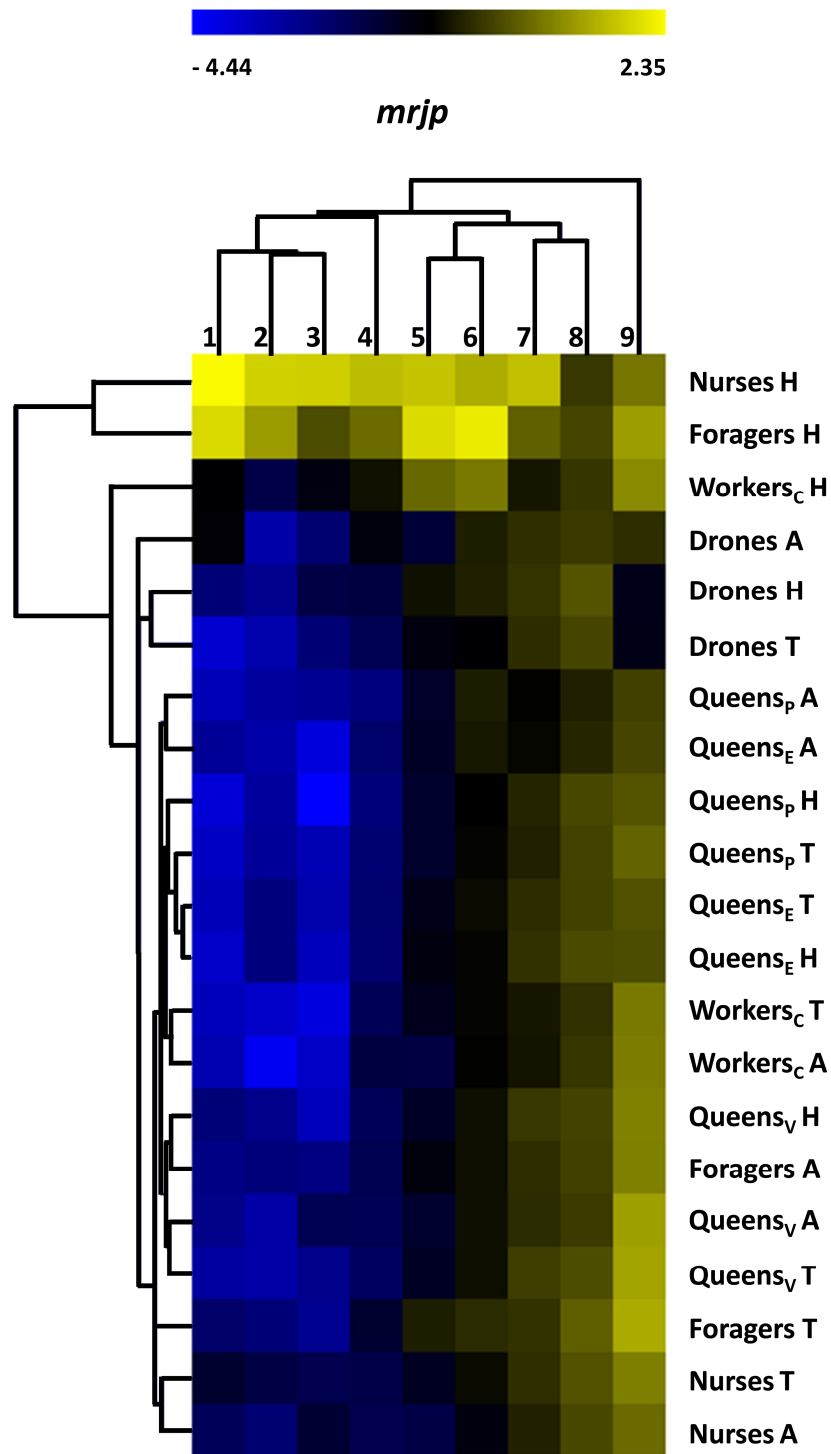

**Figure S2:** Two-way hierarchical clustering analysis heat map and dendrogram of *mrjp* gene expression data over all honeybee castes and groups. Branch lengths in dendrograms produced from cluster analysis correspond to the relative degree of similarity between branches. Differential gene expression is represented for all genes as a color gradient across all samples from deep blue (lowest) to light yellow (highest). The expression values were log transformed and visualized using MultiExperiment Viewer (MeV) version 4.9.

**Table S1:** Primer characteristics for qPCR. Primer sequences for *RpS5a* and *arp1* were adopted from Evans (2006) and Gregorc *et al.*, (2012).

| Name                |   | Primer Sequence (5'-3')   | Size (bp) | Product T <sub>m</sub> (°C) | PCR efficiency | GenBank Gene ID |
|---------------------|---|---------------------------|-----------|-----------------------------|----------------|-----------------|
| <b><i>mrjp1</i></b> | F | TGACATACATTACGAAGGAGTCCA  | 89        | 76.5                        | 2.04           | 406090          |
|                     | R | ATCCGAAGAAGAGAACGCCA      |           |                             |                |                 |
| <b><i>mrjp2</i></b> | F | CGTCCAATACCAAGGATCCGAA    | 90        | 78.0                        | 2.01           | 406091          |
|                     | R | ACAAGTCCGACGAAGAGGAC      |           |                             |                |                 |
| <b><i>mrjp3</i></b> | F | TGGACAGATGGCGTGATAAGAC    | 102       | 77.0                        | 1.96           | 406120          |
|                     | R | GAGGTCCACCTTTGCCCTTT      |           |                             |                |                 |
| <b><i>mrjp4</i></b> | F | AGACAAAATATCGATGTCGTAGCTC | 91        | 77.0                        | 2.04           | 406133          |
|                     | R | TGCCAGATTGTGGAACGTTTT     |           |                             |                |                 |
| <b><i>mrjp5</i></b> | F | AGAAAATATGGATATGGTCGCTCAG | 80        | 76.7                        | 1.91           | 406116          |
|                     | R | ATTGTGGGAGATGCATCATTTTCA  |           |                             |                |                 |
| <b><i>mrjp6</i></b> | F | ACAAAATATGGATATGGTCGCTCAG | 146       | 75.0                        | 1.90           | 406149          |
|                     | R | TCTGCATTCTGTTACTTAAAGCCAA |           |                             |                |                 |
| <b><i>mrjp7</i></b> | F | AGAAAATACCGATATGGTCGCC    | 95        | 76.0                        | 2.01           | 409555          |
|                     | R | CAATAATGACGATATGTGGGAGCA  |           |                             |                |                 |
| <b><i>mrjp8</i></b> | F | TGGACTCAAGCATCGGCTAA      | 130       | 79.0                        | 1.99           | 406067          |
|                     | R | TGGCAACCACTTCGATATTTCTT   |           |                             |                |                 |
| <b><i>mrjp9</i></b> | F | TCGGAAACTGGTGCTCTCTT      | 103       | 80.0                        | 1.85           | 409873          |
|                     | R | TGGCGACTATTTCAATATTCCTTCT |           |                             |                |                 |
| <b><i>RpS5a</i></b> | F | AATTATTTGGTCGCTGGAATTG    | 115       | 75.0                        | 2.07           | 409728          |
|                     | R | TAACGTCCAGCAGAATGTGGTA    |           |                             |                |                 |
| <b><i>arp1</i></b>  | F | TTGTATGCCAACACTGTCCTTT    | 120       | 79.0                        | 1.91           | 406122          |
|                     | R | TGGCGGATGATCTTAATTT       |           |                             |                |                 |

**Table S2:** Expression profile of a specific *major royal jelly protein* over all analyzed groups within honeybee body sections.

| Relative <i>mrjp</i> gene expression within body sections |                |                               |                               |                               |                               |                               |                             |                             |                               |                               |                               |                               |                               |                             |                             |                             |                               |                               |                               |                               |                             |  |
|-----------------------------------------------------------|----------------|-------------------------------|-------------------------------|-------------------------------|-------------------------------|-------------------------------|-----------------------------|-----------------------------|-------------------------------|-------------------------------|-------------------------------|-------------------------------|-------------------------------|-----------------------------|-----------------------------|-----------------------------|-------------------------------|-------------------------------|-------------------------------|-------------------------------|-----------------------------|--|
|                                                           | Head           |                               |                               |                               |                               |                               |                             | Thorax                      |                               |                               |                               |                               |                               |                             | Abdomen                     |                             |                               |                               |                               |                               |                             |  |
| <b><i>mrjp1</i></b>                                       | N <sup>a</sup> | F <sup>a</sup>                | C <sup>b</sup>                | D <sup>c</sup>                | Q <sub>V</sub> <sup>c</sup>   | Q <sub>E</sub> <sup>c</sup>   | Q <sub>P</sub> <sup>c</sup> | N <sup>a</sup>              | F <sup>b</sup>                | Q <sub>V</sub> <sup>b,c</sup> | Q <sub>E</sub> <sup>c</sup>   | C <sup>c</sup>                | Q <sub>P</sub> <sup>c</sup>   | D <sup>c</sup>              | D <sup>a</sup>              | N <sup>a,b</sup>            | F <sup>a,b</sup>              | Q <sub>V</sub> <sup>a,b</sup> | Q <sub>E</sub> <sup>b</sup>   | C <sup>b</sup>                | Q <sub>P</sub> <sup>b</sup> |  |
| <b><i>mrjp2</i></b>                                       | N <sup>a</sup> | F <sup>a</sup>                | C <sup>b</sup>                | Q <sub>E</sub> <sup>b,c</sup> | Q <sub>V</sub> <sup>c</sup>   | D <sup>b,c</sup>              | Q <sub>P</sub> <sup>c</sup> | N <sup>a</sup>              | F <sup>a,b</sup>              | Q <sub>E</sub> <sup>a,b</sup> | Q <sub>P</sub> <sup>b,c</sup> | Q <sub>V</sub> <sup>b,c</sup> | D <sup>b,c</sup>              | C <sup>c</sup>              | N <sup>a</sup>              | F <sup>a</sup>              | Q <sub>P</sub> <sup>a</sup>   | Q <sub>V</sub> <sup>a</sup>   | Q <sub>E</sub> <sup>a</sup>   | D <sup>a</sup>                | C <sup>a</sup>              |  |
| <b><i>mrjp3</i></b>                                       | N <sup>a</sup> | F <sup>b</sup>                | C <sup>c</sup>                | D <sup>c,d</sup>              | Q <sub>V</sub> <sup>d,e</sup> | Q <sub>E</sub> <sup>d,e</sup> | Q <sub>P</sub> <sup>e</sup> | N <sup>a</sup>              | D <sup>a,b</sup>              | Q <sub>V</sub> <sup>a,b</sup> | F <sup>a,b</sup>              | Q <sub>E</sub> <sup>a,b</sup> | Q <sub>P</sub> <sup>a,b</sup> | C <sup>b</sup>              | N <sup>a</sup>              | Q <sub>V</sub> <sup>b</sup> | D <sup>b</sup>                | F <sup>b</sup>                | Q <sub>P</sub> <sup>b</sup>   | C <sup>b</sup>                | Q <sub>E</sub> <sup>b</sup> |  |
| <b><i>mrjp4</i></b>                                       | N <sup>a</sup> | F <sup>b</sup>                | C <sup>c</sup>                | D <sup>d</sup>                | Q <sub>V</sub> <sup>d</sup>   | Q <sub>E</sub> <sup>d</sup>   | Q <sub>P</sub> <sup>d</sup> | F <sup>a</sup>              | N <sup>a,b</sup>              | D <sup>b</sup>                | C <sup>b</sup>                | Q <sub>V</sub> <sup>b</sup>   | Q <sub>E</sub> <sup>b</sup>   | Q <sub>P</sub> <sup>b</sup> | D <sup>a</sup>              | C <sup>a,b</sup>            | N <sup>b,c</sup>              | F <sup>b,c</sup>              | Q <sub>V</sub> <sup>b,c</sup> | Q <sub>E</sub> <sup>b,c</sup> | Q <sub>P</sub> <sup>c</sup> |  |
| <b><i>mrjp5</i></b>                                       | F <sup>a</sup> | N <sup>a</sup>                | C <sup>b</sup>                | D <sup>c</sup>                | Q <sub>E</sub> <sup>c,d</sup> | Q <sub>V</sub> <sup>d</sup>   | Q <sub>P</sub> <sup>d</sup> | F <sup>a</sup>              | D <sup>a,b</sup>              | Q <sub>E</sub> <sup>b</sup>   | C <sup>b</sup>                | N <sup>b</sup>                | Q <sub>V</sub> <sup>b</sup>   | Q <sub>P</sub> <sup>b</sup> | F <sup>a</sup>              | Q <sub>E</sub> <sup>a</sup> | Q <sub>P</sub> <sup>a</sup>   | Q <sub>V</sub> <sup>a</sup>   | D <sup>a</sup>                | C <sup>a</sup>                | N <sup>a</sup>              |  |
| <b><i>mrjp6</i></b>                                       | F <sup>a</sup> | N <sup>b</sup>                | C <sup>c</sup>                | D <sup>d</sup>                | Q <sub>V</sub> <sup>d,e</sup> | Q <sub>E</sub> <sup>d,e</sup> | Q <sub>P</sub> <sup>e</sup> | F <sup>a</sup>              | Q <sub>V</sub> <sup>a,b</sup> | Q <sub>E</sub> <sup>a,b</sup> | N <sup>b</sup>                | Q <sub>P</sub> <sup>b</sup>   | C <sup>b</sup>                | D <sup>b</sup>              | D <sup>a</sup>              | Q <sub>P</sub> <sup>a</sup> | Q <sub>E</sub> <sup>a</sup>   | Q <sub>V</sub> <sup>a</sup>   | F <sup>a</sup>                | C <sup>a</sup>                | N <sup>a</sup>              |  |
| <b><i>mrjp7</i></b>                                       | N <sup>a</sup> | F <sup>a,b</sup>              | Q <sub>V</sub> <sup>b,c</sup> | D <sup>b,c</sup>              | Q <sub>E</sub> <sup>b,c</sup> | Q <sub>P</sub> <sup>c,d</sup> | C <sup>d</sup>              | Q <sub>V</sub> <sup>a</sup> | F <sup>a,b</sup>              | N <sup>a,b</sup>              | Q <sub>E</sub> <sup>a,b</sup> | D <sup>a,b</sup>              | Q <sub>P</sub> <sup>b</sup>   | C <sup>b</sup>              | D <sup>a</sup>              | F <sup>a</sup>              | Q <sub>V</sub> <sup>a,b</sup> | N <sup>a,b</sup>              | C <sup>a,b</sup>              | Q <sub>E</sub> <sup>b</sup>   | Q <sub>P</sub> <sup>b</sup> |  |
| <b><i>mrjp8</i></b>                                       | D <sup>a</sup> | Q <sub>E</sub> <sup>a,b</sup> | Q <sub>P</sub> <sup>a-c</sup> | F <sup>b,c</sup>              | Q <sub>V</sub> <sup>b,c</sup> | N <sup>b,c</sup>              | C <sup>c</sup>              | F <sup>a</sup>              | N <sup>a,b</sup>              | Q <sub>V</sub> <sup>a,b</sup> | D <sup>b</sup>                | Q <sub>P</sub> <sup>b</sup>   | Q <sub>E</sub> <sup>b</sup>   | C <sup>b</sup>              | N <sup>a</sup>              | F <sup>a,b</sup>            | Q <sub>V</sub> <sup>a,b</sup> | D <sup>a,b</sup>              | C <sup>a,b</sup>              | Q <sub>E</sub> <sup>b</sup>   | Q <sub>P</sub> <sup>b</sup> |  |
| <b><i>mrjp9</i></b>                                       | F <sup>a</sup> | C <sup>b</sup>                | Q <sub>V</sub> <sup>b,c</sup> | N <sup>b-d</sup>              | Q <sub>P</sub> <sup>c,d</sup> | Q <sub>E</sub> <sup>d</sup>   | D <sup>d</sup>              | F <sup>a</sup>              | Q <sub>V</sub> <sup>a</sup>   | N <sup>b</sup>                | C <sup>b,c</sup>              | Q <sub>P</sub> <sup>c,d</sup> | Q <sub>E</sub> <sup>d</sup>   | D <sup>e</sup>              | Q <sub>V</sub> <sup>a</sup> | F <sup>b</sup>              | C <sup>b,c</sup>              | N <sup>c,d</sup>              | Q <sub>E</sub> <sup>d</sup>   | Q <sub>P</sub> <sup>d</sup>   | D <sup>d</sup>              |  |

C, caged workers; N, hive nurses; F, foragers; D, drones; Q<sub>V</sub>, virgin queens; Q<sub>E</sub>, queens with eggs; Q<sub>P</sub>, queens with pupae. Data were analyzed with one-way ANOVA followed by Bonferroni post-hoc test. Data that did not match normality untransformed, were log- or Box-Cox-transformed. <sup>a-e</sup>Gene expression of groups in the same row with different superscripts is significantly different ( $P < 0.05$ ). Genes are listed according to their mean expression values from large to small. Relative gene expression levels are given in Table 1 of the main manuscript and statistical details for all groups and genes in additional file 2.

**Table S3:** Expression profiles of all *major royal jelly proteins* in a specific group within honeybee body sections.

| Relative <i>mrjp</i> gene expression within body sections |                |                  |                  |                  |                  |                  |                  |                  |                |                |                  |                  |                  |                  |                  |                  |                  |                |                |                  |                  |                  |                  |                  |                  |                  |                |
|-----------------------------------------------------------|----------------|------------------|------------------|------------------|------------------|------------------|------------------|------------------|----------------|----------------|------------------|------------------|------------------|------------------|------------------|------------------|------------------|----------------|----------------|------------------|------------------|------------------|------------------|------------------|------------------|------------------|----------------|
|                                                           | Head           |                  |                  |                  |                  |                  |                  |                  |                | Thorax         |                  |                  |                  |                  |                  |                  | Abdomen          |                |                |                  |                  |                  |                  |                  |                  |                  |                |
| <b>C</b>                                                  | 9 <sup>a</sup> | 6 <sup>a</sup>   | 5 <sup>a</sup>   | 8 <sup>b</sup>   | 7 <sup>b,c</sup> | 4 <sup>b-d</sup> | 1 <sup>c,d</sup> | 3 <sup>d,e</sup> | 2 <sup>e</sup> | 9 <sup>a</sup> | 8 <sup>b</sup>   | 7 <sup>b,c</sup> | 6 <sup>b,c</sup> | 5 <sup>c,d</sup> | 4 <sup>d</sup>   | 1 <sup>e</sup>   | 2 <sup>e</sup>   | 3 <sup>e</sup> | 9 <sup>a</sup> | 8 <sup>b</sup>   | 7 <sup>c</sup>   | 6 <sup>c</sup>   | 4 <sup>d</sup>   | 5 <sup>d</sup>   | 1 <sup>e</sup>   | 3 <sup>e</sup>   | 2 <sup>e</sup> |
| <b>N</b>                                                  | 1 <sup>a</sup> | 2 <sup>b</sup>   | 3 <sup>b</sup>   | 5 <sup>b,c</sup> | 7 <sup>b,c</sup> | 4 <sup>b,c</sup> | 6 <sup>c</sup>   | 9 <sup>d</sup>   | 8 <sup>e</sup> | 9 <sup>a</sup> | 8 <sup>a,b</sup> | 7 <sup>b,c</sup> | 6 <sup>c,d</sup> | 5 <sup>d,e</sup> | 1 <sup>d,e</sup> | 2 <sup>e</sup>   | 4 <sup>e</sup>   | 3 <sup>e</sup> | 9 <sup>a</sup> | 8 <sup>b</sup>   | 7 <sup>c</sup>   | 6 <sup>d</sup>   | 3 <sup>d,e</sup> | 5 <sup>e,f</sup> | 4 <sup>e,f</sup> | 1 <sup>e,f</sup> | 2 <sup>f</sup> |
| <b>F</b>                                                  | 6 <sup>a</sup> | 5 <sup>a,b</sup> | 1 <sup>a,b</sup> | 9 <sup>b,c</sup> | 2 <sup>b,c</sup> | 4 <sup>c,d</sup> | 7 <sup>c,d</sup> | 3 <sup>d</sup>   | 8 <sup>d</sup> | 9 <sup>a</sup> | 8 <sup>b</sup>   | 7 <sup>c</sup>   | 6 <sup>c</sup>   | 5 <sup>c</sup>   | 4 <sup>d</sup>   | 1 <sup>e</sup>   | 2 <sup>e</sup>   | 3 <sup>e</sup> | 9 <sup>a</sup> | 8 <sup>b</sup>   | 7 <sup>b</sup>   | 6 <sup>c</sup>   | 5 <sup>d</sup>   | 4 <sup>e</sup>   | 2 <sup>f</sup>   | 3 <sup>f</sup>   | 1 <sup>f</sup> |
| <b>D</b>                                                  | 8 <sup>a</sup> | 7 <sup>a,b</sup> | 6 <sup>a-c</sup> | 5 <sup>b-d</sup> | 9 <sup>c-e</sup> | 4 <sup>d-f</sup> | 3 <sup>e,f</sup> | 1 <sup>f</sup>   | 2 <sup>f</sup> | 8 <sup>a</sup> | 7 <sup>a,b</sup> | 6 <sup>b,c</sup> | 5 <sup>b,c</sup> | 9 <sup>b,c</sup> | 4 <sup>c,d</sup> | 3 <sup>d,e</sup> | 2 <sup>d,e</sup> | 1 <sup>e</sup> | 8 <sup>a</sup> | 7 <sup>a,b</sup> | 9 <sup>a,b</sup> | 6 <sup>b,c</sup> | 1 <sup>c</sup>   | 4 <sup>c</sup>   | 5 <sup>c</sup>   | 3 <sup>c</sup>   | 2 <sup>c</sup> |
| <b>Q<sub>V</sub></b>                                      | 9 <sup>a</sup> | 8 <sup>b</sup>   | 7 <sup>b</sup>   | 6 <sup>b,c</sup> | 5 <sup>c,d</sup> | 4 <sup>d,e</sup> | 1 <sup>e,f</sup> | 2 <sup>e,f</sup> | 3 <sup>f</sup> | 9 <sup>a</sup> | 8 <sup>b</sup>   | 7 <sup>b</sup>   | 6 <sup>c</sup>   | 5 <sup>d</sup>   | 4 <sup>e</sup>   | 3 <sup>f</sup>   | 1 <sup>f</sup>   | 2 <sup>f</sup> | 9 <sup>a</sup> | 8 <sup>b</sup>   | 7 <sup>b</sup>   | 6 <sup>c</sup>   | 5 <sup>d</sup>   | 3 <sup>e</sup>   | 4 <sup>e</sup>   | 1 <sup>f</sup>   | 2 <sup>g</sup> |
| <b>Q<sub>E</sub></b>                                      | 9 <sup>a</sup> | 8 <sup>a</sup>   | 7 <sup>a</sup>   | 6 <sup>b</sup>   | 5 <sup>b</sup>   | 4 <sup>c</sup>   | 2 <sup>c</sup>   | 3 <sup>d</sup>   | 1 <sup>d</sup> | 9 <sup>a</sup> | 8 <sup>a,b</sup> | 7 <sup>a-c</sup> | 6 <sup>b,c</sup> | 5 <sup>c,d</sup> | 4 <sup>d,e</sup> | 2 <sup>d,e</sup> | 3 <sup>e</sup>   | 1 <sup>e</sup> | 9 <sup>a</sup> | 8 <sup>a,b</sup> | 6 <sup>a-c</sup> | 7 <sup>a-c</sup> | 5 <sup>b-d</sup> | 4 <sup>b-d</sup> | 1 <sup>c,d</sup> | 2 <sup>c,d</sup> | 3 <sup>d</sup> |
| <b>Q<sub>P</sub></b>                                      | 9 <sup>a</sup> | 8 <sup>a</sup>   | 7 <sup>a,b</sup> | 6 <sup>b,c</sup> | 5 <sup>c</sup>   | 4 <sup>d</sup>   | 2 <sup>d,e</sup> | 1 <sup>e,f</sup> | 3 <sup>f</sup> | 9 <sup>a</sup> | 8 <sup>a</sup>   | 7 <sup>b</sup>   | 6 <sup>b</sup>   | 5 <sup>c</sup>   | 4 <sup>d</sup>   | 2 <sup>d,e</sup> | 3 <sup>e</sup>   | 1 <sup>e</sup> | 9 <sup>a</sup> | 8 <sup>a,b</sup> | 6 <sup>b</sup>   | 7 <sup>b,c</sup> | 5 <sup>c</sup>   | 4 <sup>d</sup>   | 3 <sup>d</sup>   | 2 <sup>d</sup>   | 1 <sup>d</sup> |

C, caged workers; N, hive nurses; F, foragers; D, drones; Q<sub>V</sub>, virgin queens; Q<sub>E</sub>, queens with eggs; Q<sub>P</sub>, queens with pupae. Data were analyzed with one-way ANOVA followed by Bonferroni post-hoc test. Data that did not match normality untransformed, were log- or Box-Cox-transformed. <sup>a-g</sup> Gene expression of *mrjps* in the same row with different superscripts is significantly different ( $P < 0.05$ ). Genes are listed according to their mean expression values from large to small. Relative gene expression levels are given in Table 1 of the main manuscript and statistical details for all groups and genes in additional file 2.

**Table S4:** Amino acid sequence identities of all *Apis mellifera* MRJPs and the single MRJPs of *Bombus terrestris* (GenBank: ADW82102.1), *Megachile rotundata* (GenBank: XP\_003708472.1), *Camponotus floridanus* (GenBank: EFN61808.1) and *Harpegnathos saltator* (GenBank: EFN81209.1). Sequence identities were determined using ClustalW2 (<http://www.ebi.ac.uk/Tools/msa/clustalw2/>).

|          | <i>B. terrestris</i> | <i>M. rotundata</i> | <i>C. floridanus</i> | <i>H. saltator</i> |
|----------|----------------------|---------------------|----------------------|--------------------|
| Am_MRJP1 | 48.9%                | 46.1%               | 39.3%                | 36.3%              |
| Am_MRJP2 | 48.9%                | 43.9%               | 39.3%                | 36.3%              |
| Am_MRJP3 | 46.7%                | 44.6%               | 37.9%                | 35.8%              |
| Am_MRJP4 | 42.6%                | 38.7%               | 33.7%                | 31.5%              |
| Am_MRJP5 | 47.5%                | 43.6%               | 39.3%                | 36.3%              |
| Am_MRJP6 | 46.2%                | 45.4%               | 40.6%                | 37.8%              |
| Am_MRJP7 | 48.4%                | 46.1%               | 41.6%                | 38.0%              |
| Am_MRJP8 | 52.3%                | 46.4%               | 44.0%                | 41.3%              |
| Am_MRJP9 | 55.5%                | 49.6%               | 46.4%                | 44.0%              |
